# Supplementary material for: Isotopic reconnaissance of urban water supply system dynamics
Source: Copernicus journal article supplement (doi:10.5194/hess-22-6109-2018), 2018-11-28
Supplement: Supplementary file 1 [file hess-22-6109-2018-supplement.zip]

Archive with 6 entries (5 files):
- supplementary_HESS_final/
- supplementary_HESS_final/Sources_June_2015.csv
- supplementary_HESS_final/June_2015_analysis.R
- supplementary_HESS_final/June_2015_distribution_sites.csv
- supplementary_HESS_final/Supplementary Material.docx
- hess-22-6109-2018-supplement-title-page.pdf
