# Supplementary material for: Isotopic reconnaissance of urban water supply system dynamics
Source: Copernicus journal article supplement (doi:10.5194/hess-22-6109-2018), 2018-11-28
Supplement: Supplementary file 1 [file hess-22-6109-2018-supplement.zip › hess-22-6109-2018-supplement-title-page.pdf]

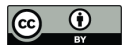

## *Supplement of*

# **Isotopic reconnaissance of urban water supply system dynamics**

**Yusuf Jameel et al.**

*Correspondence to:* Yusuf Jameel ([yusuf.jameel@utah.edu](mailto:yusuf.jameel@utah.edu))

- [hess-22-6109-2018-supplement-title-page.pdf](#)
- [supplementary\\_HESS\\_final](#)
  - [June\\_2015\\_analysis.R](#)
  - [June\\_2015\\_distribution\\_sites.csv](#)
  - [Sources\\_June\\_2015.csv](#)
  - [Supplementary Material.docx](#)

The copyright of individual parts of the supplement might differ from the CC BY 4.0 License.
