# Supplementary material for: Isotopic reconnaissance of urban water supply system dynamics
Source: Copernicus journal article supplement (doi:10.5194/hess-22-6109-2018), 2018-11-28
Supplement: Supplementary file 1 [file hess-22-6109-2018-supplement.zip › supplementary_HESS_final/June_2015_distribution_sites.csv]

	mean_d18O	mean_d2H	mean_DEX	stdev_d18O	stdev_d2H	stdev_DEX	month	year	lat	lon	SITE_ID	type	volumes	fraction
1	-15.51	-114	10.08	0.070710678	0.212132034	0.325269119	6	2015	40.556296	-111.853369	JVWCD-001	Distribution_site
2	-16.595	-123.79	8.965	0.021213203	0.141421356	0.021213203	6	2015	40.653687	-111.853077	JVWCD-002	Distribution_site
3	-15.65	-115.08	10.12	0.05828	0.16682	0.234523729	6	2015	40.498096	-111.891647	JVWCD-003	Distribution_site
4	-16.7	-124.05	9.54	0.02018	0.03991	0.069646732	6	2015	40.629605	-111.852024	JVWCD-004	Distribution_site
5	-15.4	-118.46	4.72	0.01948	0.09506	0.109873413	6	2015	40.49752	-112.005697	JVWCD-005	Distribution_site
6	-15.39	-118.17	4.92	0.03335	0.19891	0.220143063	6	2015	40.494011	-112.011239	JVWCD-006	Distribution_site
7	-15.64	-113.73	11.41	0.01718	0.1429	0.150935845	6	2015	40.543768	-111.829323	JVWCD-008	Distribution_site
8	-15.53	-113.95	10.32	0.0247	0.20803	0.21944749	6	2015	40.594998	-111.824342	JVWCD-010	Distribution_site
9	-15.51	-115.72	8.34	0.0107	0.14977	0.152797163	6	2015	40.663761	-111.816449	JVWCD-011	Distribution_site
10	-15.43	-118.63	4.83	0.11267	0.36749	0.486420735	6	2015	40.638609	-111.957308	JVWCD-012	Distribution_site
11	-16.13	-119.74	9.29	0.06841	0.26355	0.326952638	6	2015	40.695068	-111.882332	JVWCD-013	Distribution_site
12	-15.42	-118.48	4.865	0.042426407	0.127279221	0.233345238	6	2015	40.54415	-111.967989	JVWCD-014	Distribution_site
13	-15.415	-118.26	5.055	0.049497475	0.282842712	0.091923882	6	2015	40.638463	-111.966966	JVWCD-015	Distribution_site
14	-15.46	-118.66	5	0.011	0.1145	0.118651802	6	2015	40.698125	-111.9112	JVWCD-016	Distribution_site
15	-15.43	-118.55	4.92	0.05953	0.31538	0.357512394	6	2015	40.695765	-111.898175	JVWCD-017	Distribution_site
16	-15.37	-118.48	4.47	0.03852	0.10073	0.148380781	6	2015	40.566134	-111.976416	JVWCD-018	Distribution_site
17	-15.51	-115.54	8.53	0.0418	0.10875	0.160637737	6	2015	40.69434	-111.920715	JVWCD-019	Distribution_site
18	-15.45	-118.1933333	5.416666667	0.036055513	0.187705443	0.120554275	6	2015	40.726782	-111.979864	JVWCD-020	Distribution_site
19	-15.46	-118.6	5.04	0.05476	0.38487	0.414866458	6	2015	40.689383	-111.893975	JVWCD-021	Distribution_site
20	-16.11	-119.15	9.73	0.04577	0.16882	0.212742416	6	2015	40.678411	-111.880073	JVWCD-022	Distribution_site
21	-15.52	-118.84	5.3	0.11276	0.37502	0.492299239	6	2015	40.684775	-111.882575	JVWCD-023	Distribution_site
22	-15.64	-116.73	8.38	0.01753	0.14181	0.150228104	6	2015	40.684304	-111.911173	JVWCD-024	Distribution_site
23	-16.18	-120.08	9.36	0.05461	0.26807	0.309385749	6	2015	40.682745	-111.876451	JVWCD-025	Distribution_site
24	-15.57	-119.02	5.53	0.04446	0.26003	0.288841018	6	2015	40.682916	-111.899196	JVWCD-026	Distribution_site
25	-15.45	-118.32	5.26	0.07084	0.13357	0.240805709	6	2015	40.67476	-111.981562	JVWCD-027	Distribution_site
26	-16.11	-119.14	9.72	0.08787	0.40425	0.47453889	6	2015	40.670696	-111.87062	JVWCD-028	Distribution_site
27	-15.8	-115.85	10.58	0.11067	0.23418	0.390925906	6	2015	40.668282	-111.806132	JVWCD-029	Distribution_site
28	-15.46	-118.28	5.4	0.014142136	0.155563492	0.042426407	6	2015	40.667402	-112.005725	JVWCD-030	Distribution_site
29	-15.48	-118.68	5.13	0.11829	0.37494	0.502513877	6	2015	40.522978	-112.009369	JVWCD-031	Distribution_site
30	-15.685	-115.57	9.895	0.049497475	1.216223664	0.799030663	6	2015	40.661895	-111.821229	JVWCD-032	Distribution_site
31	-15.62	-113.82	11.12	0.01572	0.04988	0.066820368	6	2015	40.615073	-111.877101	JVWCD-033	Distribution_site
32	-15.53	-118.65	5.59	0.04182	0.23492	0.263018451	6	2015	40.499419	-112.012828	JVWCD-034	Distribution_site
33	-15.7	-114.62	10.99	0.09214	0.45828	0.527199009	6	2015	40.658513	-111.859695	JVWCD-035	Distribution_site
34	-15.68	-119.39	6.06	0.05474	0.34947	0.382231634	6	2015	40.694437	-111.905426	JVWCD-036	Distribution_site
35	-15.63	-115.53	9.5	0.04569	0.03917	0.135036653	6	2015	40.653032	-111.861725	JVWCD-037	Distribution_site
36	-16.19	-120.15	9.34	0.09307	0.28109	0.385107501	6	2015	40.688747	-111.875144	JVWCD-038	Distribution_site
37	-15.405	-118.485	4.745	0.120208153	0.077781746	0.855599205	6	2015	40.536962	-112.024307	JVWCD-039	Distribution_site
38	-15.53	-117.32	6.92	0.02201	0.14886	0.161353092	6	2015	40.50828	-112.024109	JVWCD-040	Distribution_site
39	-15.71	-119.93	5.76	0.07532	0.4375	0.486611826	6	2015	40.647078	-112.005548	JVWCD-041	Distribution_site
40	-16.66	-124.05	9.22	0.03503	0.19231	0.216332945	6	2015	40.6432	-111.853752	JVWCD-042	Distribution_site
41	-15.42	-118.29	5.04	0.04893	0.27257	0.305691943	6	2015	40.567822	-112.036117	JVWCD-043	Distribution_site
42	-15.48	-118.79	5.02	0.05301	0.12043	0.192311897	6	2015	40.667575	-112.034515	JVWCD-044	Distribution_site
43	-16.58	-123.89	8.77	0.00816	0.06512	0.069089067	6	2015	40.638722	-111.858556	JVWCD-045	Distribution_site
44	-15.67	-114.92	10.42	0.01602	0.07009	0.083460957	6	2015	40.634095	-111.866393	JVWCD-046	Distribution_site
45	-15.63	-113.65	11.4	0.01723	0.20562	0.211316274	6	2015	40.634829	-111.9388	JVWCD-047	Distribution_site
46	-15.58	-113.72	10.92	0.07509	0.23338	0.31555394	6	2015	40.632013	-111.92928	JVWCD-048	Distribution_site
47	-16.67	-123.88	9.44	0.04587	0.08659	0.155981676	6	2015	40.632038	-111.857198	JVWCD-049	Distribution_site
48	-15.55	-112.99	11.37	0.02919	0.23069	0.24501903	6	2015	40.544266	-111.910352	JVWCD-050	Distribution_site
49	-15.66	-114.43	10.83	0.06122	0.3588	0.398397474	6	2015	40.624264	-111.865347	JVWCD-051	Distribution_site
50	-15.42	-118.65	4.68	0.02744	0.08308	0.113692195	6	2015	40.682123	-112.063211	JVWCD-052	Distribution_site
51	-15.955	-117.855	9.805	0.06363961	0.51618795	1.039446968	6	2015	40.675527	-111.870602	JVWCD-053	Distribution_site
52	-16.15	-121.06	8.11	0.00778	0.06337	0.067081921	6	2015	40.692962	-111.869656	JVWCD-054	Distribution_site
53	-15.565	-114.55	9.97	0.091923882	0.848528137	1.569777054	6	2015	40.672496	-111.85711	JVWCD-055	Distribution_site
54	-15.39	-118.72	4.43	0.08376	0.31944	0.397703174	6	2015	40.691788	-111.914146	JVWCD-056	Distribution_site
55	-15.53	-114.04	10.24	0.01923	0.07974	0.096523628	6	2015	40.596296	-111.855902	JVWCD-057	Distribution_site
56	-15.71	-114.97	10.7	0.03176	0.13113	0.158948601	6	2015	40.485737	-111.916063	JVWCD-058	Distribution_site
57	-15.69	-114.89	10.66	0.04858	0.17471	0.222269466	6	2015	40.589546	-111.809038	JVWCD-059	Distribution_site
58	-15.47	-118.495	5.235	0.028284271	0.134350288	0.374766594	6	2015	40.587804	-111.967287	JVWCD-060	Distribution_site
59	-16.69	-124.06	9.5	0.02965	0.09347	0.125577151	6	2015	40.645437	-111.8628	JVWCD-061	Distribution_site
62	-15.6	-116.43	8.376666667	0.185202592	1.974537921	3.22803862	6	2015	40.475924	-111.906062	JVWCD-065	Distribution_site
63	-15.435	-118.245	5.245	0.106066017	0.445477272	0.417193001	6	2015	40.642764	-111.977307	JVWCD-067	Distribution_site
64	-15.45	-115.46	8.16	0.03195	0.16542	0.188494553	6	2015	40.611546	-111.872457	JVWCD-068	Distribution_site
65	-16.05	-119.53	8.9	0.03441	0.1067	0.144420479	6	2015	40.695067	-111.88229	JVWCD-100	Distribution_site
66	-15.55	-114.1	10.28	0.00841	0.11744	0.119824782	6	2015	40.54447	-111.883263	JVWCD-101	Distribution_site
67	-15.42	-116.13	7.25	0.02291	0.03525	0.073766573	6	2015	40.580533	-111.85684	JVWCD-102	Distribution_site
310	-15.47	-118.59	5.195	0.056568542	0.070710678	0.374766594	6	2015	40.473194	-111.966059	JVWCD-069	source_water	10500	0.804844397
510	-15.6	-114.012	10.55333333	0.4532	0.994199846	0.973515965	6	2015	40.541066	-111.819048	JVWCD-072	source_water	1200	0.091982217
210	-16.04	-124.04	4.24	0.035355339	0.06363961	0.339411255	6	2015	40.602075	-111.928449	JVWCD-063	source_water	500	0.038325924
231	-16.60686204	-123.7584213	9.095	0.096991886	0.185646218	0.586898628	10	2015	40.634841	-111.850583	JVWCD-120	source_water	320	0.018396443
351	-16.4	-122.36	8.84	0.02635	0.0738	0.104885747	6	2015	40.612881	-111.8431	JVWCD-110	source_water	126	0.009658133
321	-16.28	-121.62	8.65	0.05798	0.31404	0.354280348	6	2015	40.606104	-111.841137	JVWCD-107	source_water	108	0.0082784
151	-16.545	-123.5	8.84	0.176776695	0.90509668	0.523259018	6	2015	40.674311	-111.859856	JVWCD-083	source_water	81	0.0062088
201	-15.4	-115.87	7.31	0.00316	0.10564	0.106017425	6	2015	40.580732	-111.827718	JVWCD-088	source_water	70	0.005365629
311	-16.27	-120.68	9.45	0.04722	0.09237	0.162388559	6	2015	40.587553	-111.815233	JVWCD-106	source_water	80	0.006132148
331	-16.13	-120.06	9.01	0.06808	0.0977	0.215926796	6	2015	40.602067	-111.822332	JVWCD-108	source_water	37	0.002836118
261	-15.80723045	-122.5888571	4.46898653	0.014898237	0.044315274	0.061151478	2	2016	40.486532	-111.934253	JVWCD-125	source_water	41	0.003142726
