# Supplementary material for: Isotopic reconnaissance of urban water supply system dynamics
Source: Copernicus journal article supplement (doi:10.5194/hess-22-6109-2018), 2018-11-28
Supplement: Supplementary file 1 [file hess-22-6109-2018-supplement.zip › supplementary_HESS_final/Sources_June_2015.csv]

source	Name_source	mean_d18O	mean_d2H
SRC1	JVTP	-15.43	-118.54
SRC1	JVTP	-15.51	-118.64
SRC1	JVTP	-15.48	-118.76
SRC1	JVTP	-15.48	-118.45
SRC2	SETP	-15.59	-115.23
SRC2	SETP	-15.59	-113.96
SRC2	SETP	-15.59	-113.27
SRC2	SETP	-15.65	-114.28
SRC2	SETP	-15.6	-113.32
SRC3	SWTP	-15.91	-122.7
SRC3	SWTP	-16.28	-126.06
SRC3	SWTP	-15.95	-123.41
SRC4	64S/70S Well	-16.53	-123.62
SRC4	64S/70S Well	-16.67	-123.89
SRC5	Siesta Well	-16.4	-122.36
SRC6	18E Well	-16.28	-121.62
SRC7	45S Well	-16.42	-122.86
SRC7	45S Well	-16.67	-124.14
SRC8	Solena Way Well	-15.4	-115.87
SRC9	90S Quail Well	-16.27	-120.68
SRC10	24E Well	-16.13	-120.06
SRC11	146S Well	-15.81	-122.58
