# Supplementary material for: Isotopic reconnaissance of urban water supply system dynamics
Source: Copernicus journal article supplement (doi:10.5194/hess-22-6109-2018), 2018-11-28
Supplement: Supplementary file 1 [file hess-22-6109-2018-supplement.zip › supplementary_HESS_final/Supplementary Material.docx]

**Supplementary Material**

Table S1: Monthly deuterium excess values of source water obtained from JVTP.

|  |  |  |  |
| --- | --- | --- | --- |
|  | Month | Deuterium Excess ( per mil) |  |
|  | Jun-15 | 5.1 |  |
|  |  |
|  | Jul-15 | 4.4 |  |
|  |  |
|  | Aug-15 | 4.2 |  |
|  |  |
|  | Sep-15 | 3.7 |  |
|  |  |
|  | Oct-15 | 3.9 |  |
|  |  |
|  |  |  |  |
